# Supplementary material for: The fabrication of a thiol-modified chitosan magnetic graphene oxide nanocomposite and its adsorption performance towards the illegal drug clenbuterol in pork samples
Source: Royal Society of Chemistry journal article supplement (doi:10.1039/d0dt00705f), 2020-01-01
Supplement: d0dt00705f1.pdf [file d0dt00705f1.pdf]

Table S1 Kinetic parameters for adsorption of CLE by Fe<sub>3</sub>O<sub>4</sub>@SiO<sub>2</sub>/GO/CS/MPTS.

| Kinetic model    | R <sup>2</sup> | Rate constant                                                     |
|------------------|----------------|-------------------------------------------------------------------|
| Pseudo 1st order | 0.6111         | k <sub>1</sub> (min <sup>-1</sup> )=0.0256                        |
| Pseudo 2nd order | 0.9916         | k <sub>2</sub> (g·mg <sup>-1</sup> ·min <sup>-1</sup> )=1.5054E-4 |

Table S2 Parameters for Langmuir and Freundlich isotherm models.

| Analyte     | Langmuir                             |                                      |                | Freundlich                           |         |                |
|-------------|--------------------------------------|--------------------------------------|----------------|--------------------------------------|---------|----------------|
|             | Q <sub>m</sub> (mg·g <sup>-1</sup> ) | K <sub>L</sub> (L·mg <sup>-1</sup> ) | R <sup>2</sup> | K <sub>F</sub> (mg·g <sup>-1</sup> ) | n       | R <sup>2</sup> |
| clenbuterol | 210.0840                             | 0.0468                               | 0.9909         | 1.2028                               | 20.1167 | 0.8880         |

Table S3 Analysis of variance (ANOVA) test for the second-order regression model.

| Source                          | Sum of squares         | Degree of freedom          | Mean square | F value    | p-value (prob>F)       |
|---------------------------------|------------------------|----------------------------|-------------|------------|------------------------|
| Model                           | 8995.35                | 9                          | 999.48      | 59.40      | 0.0002 significant     |
| X <sub>1</sub> (pH)             | 1554.03                | 1                          | 1554.03     | 92.35      | 0.0002                 |
| X <sub>2</sub> (Sorbent amount) | 1030.58                | 1                          | 1030.58     | 61.25      | 0.0005                 |
| X <sub>3</sub> (Sorption time)  | 0.011                  | 1                          | 0.011       | 6.686E-004 | 0.9804                 |
| X <sub>1</sub> X <sub>2</sub>   | 426.42                 | 1                          | 426.42      | 25.34      | 0.0040                 |
| X <sub>1</sub> X <sub>3</sub>   | 25.00                  | 1                          | 25.00       | 1.49       | 0.2772                 |
| X <sub>2</sub> X <sub>3</sub>   | 5.06                   | 1                          | 5.06        | 0.30       | 0.6069                 |
| X <sub>1</sub> <sup>2</sup>     | 3946.14                | 1                          | 3946.14     | 234.51     | <0.0001                |
| X <sub>2</sub> <sup>2</sup>     | 1225.28                | 1                          | 1225.28     | 72.82      | 0.0004                 |
| X <sub>3</sub> <sup>2</sup>     | 1588.49                | 1                          | 1588.49     | 94.40      | 0.0002                 |
| Residual                        | 84.13                  | 5                          | 16.83       |            |                        |
| Lack of Fit                     | 76.41                  | 3                          | 25.47       | 6.59       | 0.1345 not significant |
| Pure Error                      | 7.73                   | 2                          | 3.86        |            |                        |
| Cor Total                       | 9079.48                | 14                         |             |            |                        |
|                                 | R <sup>2</sup> =99.07% | Adj R <sup>2</sup> =97.41% | C.V.%=7.59% |            |                        |

Table S4 ME, RE and PE of the proposed method in different matrices.

| Matrices | ME (%) | RE (%) | PE (%) |
|----------|--------|--------|--------|
| Muscle   | 90.9   | 91.7   | 83.4   |
| Fat      | 92.4   | 94.5   | 87.4   |
| Liver    | 92.6   | 89.1   | 82.5   |

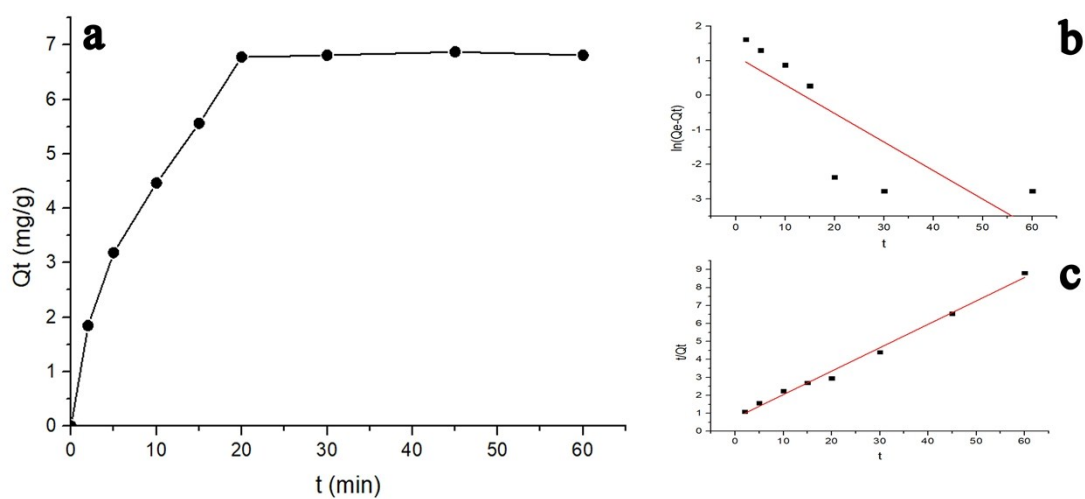

Fig. S1 Adsorption kinetics (a), Pseudo-first order (b), Pseudo-second order (c) simulation for the adsorption of clenbuterol on  $\text{Fe}_3\text{O}_4@\text{SiO}_2/\text{GO}/\text{CS}/\text{MPTS}$ .

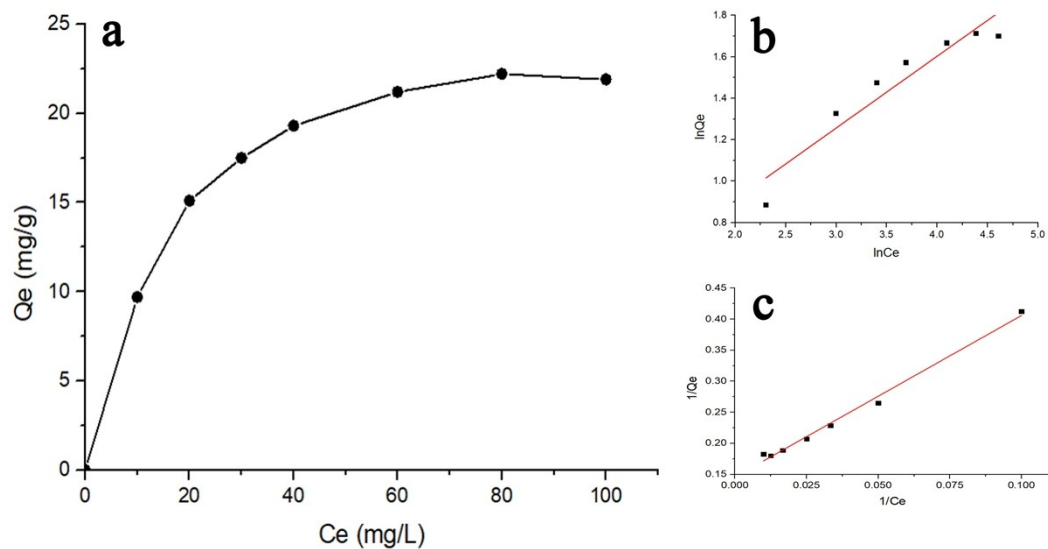

Fig. S2 Adsorption isotherm (a), Freundlich models (b) and Langmuir models (c) simulation for the adsorption of clenbuterol on  $\text{Fe}_3\text{O}_4@\text{SiO}_2/\text{GO}/\text{CS}/\text{MPTS}$ .

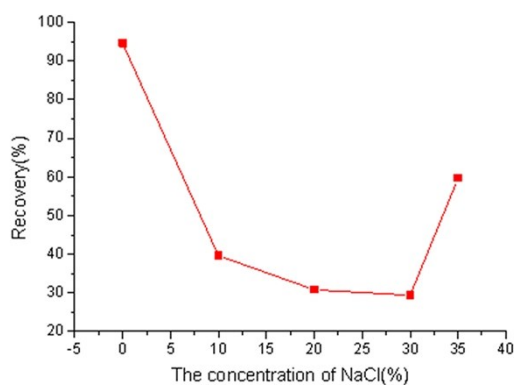

Fig. S3 The effect of ionic strength on extraction recovery of clenbuterol.

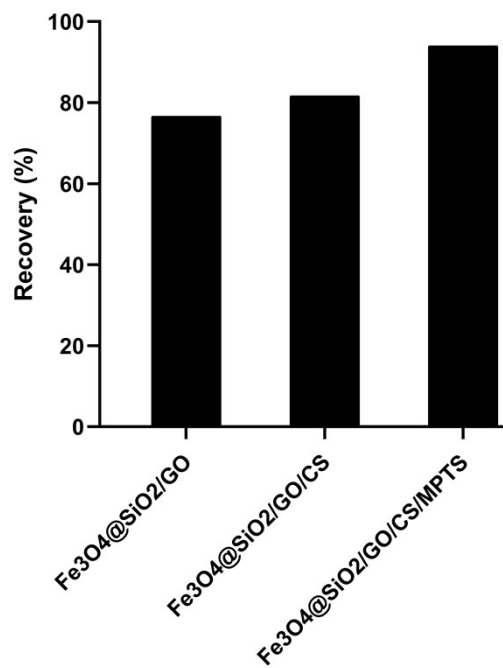

Fig. S4 Comparison of extraction efficiency of clenbuterol by Fe<sub>3</sub>O<sub>4</sub>@SiO<sub>2</sub>/GO, Fe<sub>3</sub>O<sub>4</sub>@SiO<sub>2</sub>/GO/CS, and Fe<sub>3</sub>O<sub>4</sub>@SiO<sub>2</sub>/GO/CS/MPTS.
